---

# Nucleic Acids Research

---

## Contents

Volume 36, Database issue, January 2008

---

|                                                                                                                                                     |                                                                                                                                                                                                                                                                                                                                                                                                        |         |
|-----------------------------------------------------------------------------------------------------------------------------------------------------|--------------------------------------------------------------------------------------------------------------------------------------------------------------------------------------------------------------------------------------------------------------------------------------------------------------------------------------------------------------------------------------------------------|---------|
| <b>Editorial</b>                                                                                                                                    | A.Bateman                                                                                                                                                                                                                                                                                                                                                                                              | D1      |
| <b>The Molecular Biology Database Collection: 2008 update</b>                                                                                       | M.Y.Galperin                                                                                                                                                                                                                                                                                                                                                                                           | D2–D4   |
| <b>Priorities for nucleotide trace, sequence and annotation data capture at the Ensembl Trace Archive and the EMBL Nucleotide Sequence Database</b> | G.Cochrane, R.Akhtar, P.Aldebert, N.Althorpe, A.Baldwin, K.Bates, S.Bhattacharyya, J.Bonfield, L.Bower, P.Browne, M.Castro, T.Cox, F.Demiralp, R.Eberhardt, N.Faruque, G.Hoad, M.Jang, T.Kulikova, A.Labarga, R.Leinonen, S.Leonard, Q.Lin, R.Lopez, D.Lorenc, H.McWilliam, G.Mukherjee, F.Nardone, S.Plaister, S.Robinson, S.Sobhany, R.Vaughan, D.Wu, W.Zhu, R.Apweiler, T.Hubbard and E.Birney      | D5–D12  |
| <b>Database resources of the National Center for Biotechnology Information</b>                                                                      | D.L.Wheeler, T.Barrett, D.A.Benson, S.H.Bryant, K.Canese, V.Chetvernin, D.M.Church, M.DiCuccio, R.Edgar, S.Federhen, M.Feolo, L.Y.Geer, W.Helmberg, Y.Kapustin, O.Khovayko, D.Landsman, D.J.Lipman, T.L.Madden, D.R.Maglott, V.Miller, J.Ostell, K.D.Pruitt, G.D.Schuler, M.Shumway, E.Sequeira, S.T.Sherry, K.Sirotkin, A.Souvorov, G.Starchenko, R.L.Tatusov, T.A.Tatusova, L.Wagner and E.Yaschenko | D13–D21 |
| <b>DDBJ with new system and face</b>                                                                                                                | H.Sugawara, O.Ogasawara, K.Okubo, T.Gojobori and Y.Tateno                                                                                                                                                                                                                                                                                                                                              | D22–D24 |
| <b>GenBank</b>                                                                                                                                      | D.A.Benson, I.Karsch-Mizrachi, D.J.Lipman, J.Ostell and D.L.Wheeler                                                                                                                                                                                                                                                                                                                                    | D25–D30 |
| <b>s</b> <b>GISSD: Group I Intron Sequence and Structure Database</b>                                                                               | Y.Zhou, C.Lu, Q.-J.Wu, Y.Wang, Z.-T.Sun, J.-C.Deng and Y.Zhang                                                                                                                                                                                                                                                                                                                                         | D31–D37 |
| <b>The <i>Gypsy</i> Database (GyDB) of mobile genetic elements</b>                                                                                  | C.Lloréns, R.Futami, D.Bezemer and A.Moya                                                                                                                                                                                                                                                                                                                                                              | D38–D46 |
| <b>s</b> <b>TranspoGene and microTranspoGene: transposed elements influence on the transcriptome of seven vertebrates and invertebrates</b>         | A.Levy, N.Sela and G.Ast                                                                                                                                                                                                                                                                                                                                                                               | D47–D52 |
| <b>UgMicroSatdb: database for mining microsatellites from unigenes</b>                                                                              | V.Aishwarya and P.C.Sharma                                                                                                                                                                                                                                                                                                                                                                             | D53–D56 |
| <b>UTRome.org: a platform for 3'UTR biology in <i>C. elegans</i></b>                                                                                | M.Mangone, P.MacMenamin, C.Zegar, F.Piano and K.C.Gunsalus                                                                                                                                                                                                                                                                                                                                             | D57–D62 |
| <b>ProSAS: a database for analyzing alternative splicing in the context of protein structures</b>                                                   | F.Birzele, R.Küffner, F.Meier, F.Oefinger, C.Pothast and R.Zimmer                                                                                                                                                                                                                                                                                                                                      | D63–D68 |
| <b>CMGSDB: integrating heterogeneous <i>Caenorhabditis elegans</i> data sources using compositional data mining</b>                                 | A.Pati, Y.Jin, K.Klage, R.F.Helm, L.S.Heath and N.Ramakrishnan                                                                                                                                                                                                                                                                                                                                         | D69–D76 |

*Continued*

|                                                                                                                                                                                 |                                                                                                                                                                                                                                                                                                                                                                                                           |           |
|---------------------------------------------------------------------------------------------------------------------------------------------------------------------------------|-----------------------------------------------------------------------------------------------------------------------------------------------------------------------------------------------------------------------------------------------------------------------------------------------------------------------------------------------------------------------------------------------------------|-----------|
| <b>COXPRESdb: a database of coexpressed gene networks in mammals</b>                                                                                                            | T.Obayashi, S.Hayashi, M.Shibaoka, M.Saeki, H.Ohta and K.Kinoshita                                                                                                                                                                                                                                                                                                                                        | D77–D82   |
| <b>CTCFBSDB: a CTCF-binding site database for characterization of vertebrate genomic insulators</b>                                                                             | L.Bao, M.Zhou and Y.Cui                                                                                                                                                                                                                                                                                                                                                                                   | D83–D87   |
| <b>s DBD—taxonomically broad transcription factor predictions: new content and functionality</b>                                                                                | D.Wilson, V.Charoensawan, S.K.Kummerfeld and S.A. Teichmann                                                                                                                                                                                                                                                                                                                                               | D88–D92   |
| <b>s DBTBS: a database of transcriptional regulation in <i>Bacillus subtilis</i> containing upstream intergenic conservation information</b>                                    | N.Sierro, Y.Makita, M.de Hoon and K.Nakai                                                                                                                                                                                                                                                                                                                                                                 | D93–D96   |
| <b>DBTSS: database of transcription start sites, progress report 2008</b>                                                                                                       | H.Wakaguri, R.Yamashita, Y.Suzuki, S.Sugano and K.Nakai                                                                                                                                                                                                                                                                                                                                                   | D97–D101  |
| <b>JASPAR, the open access database of transcription factor-binding profiles: new content and tools in the 2008 update</b>                                                      | J.C.Bryne, E.Valen, M.-H.E.Tang, T.Marstrand, O.Winther, I.da Piedade, A.Krogh, B.Lenhard and A.Sandelin                                                                                                                                                                                                                                                                                                  | D102–D106 |
| <b>ORegAnno: an open-access community-driven resource for regulatory annotation</b>                                                                                             | O.L.Griffith, S.B.Montgomery, B.Bernier, B.Chu, K.Kasaian, S.Aerts, S.Mahony, M.C.Sleumer, M.Bilenky, M.Haeussler, M.Griffith, S.M.Gallo, B.Giardine, B.Hooghe, P.Van Loo, E.Blanco, A.Ticoll, S.Lithwick, E.Portales-Casamar, I.J.Donaldson, G.Robertson, C.Wadelius, P.D.Bleser, D.Vlieghe, M.S.Halfon, W.Wasserman, R.Hardison, C.M.Bergman, S.J.M.Jones and The Open Regulatory Annotation Consortium | D107–D113 |
| <b>ProTISA: a comprehensive resource for translation initiation site annotation in prokaryotic genomes</b>                                                                      | G.-Q.Hu, X.Zheng, Y.-F.Yang, P.Ortet, Z.-S.She and H.Zhu                                                                                                                                                                                                                                                                                                                                                  | D114–D119 |
| <b>RegulonDB (version 6.0): gene regulation model of <i>Escherichia coli</i> K-12 beyond transcription, active (experimental) annotated promoters and Textpresso navigation</b> | S.Gama-Castro, V.Jiménez-Jacinto, M.Peralta-Gil, A.Santos-Zavaleta, M.I.Peñaloza-Spinola, B.Contreras-Moreira, J.Segura-Salazar, L.Muñiz-Rascado, I.Martínez-Flores, H.Salgado, C.Bonavides-Martínez, C.Abreu-Goodger, C.Rodríguez-Penagos, J.Miranda-Ríos, E.Morett, E.Merino, A.M.Huerta, L.Treviño-Quintanilla and J.Collado-Vides                                                                     | D120–D124 |
| <b>TransfactomeDB: a resource for exploring the nucleotide sequence specificity and condition-specific regulatory activity of <i>trans</i>-acting factors</b>                   | B.C.Foat, R.G.Tepper and H.J.Bussemaker                                                                                                                                                                                                                                                                                                                                                                   | D125–D131 |
| <b>YEAstract-DISCOVERER: new tools to improve the analysis of transcriptional regulatory associations in <i>Saccharomyces cerevisiae</i></b>                                    | P.T.Monteiro, N.D.Mendes, M.C.Teixeira, S.d'Orey, S.Tenreiro, N.P.Mira, H.Pais, A.P.Francisco, A.M.Carvalho, A.B.Lourenço, I.Sá-Correia, A.L.Oliveira and A.T.Freitas                                                                                                                                                                                                                                     | D132–D136 |
| <b>ARED Organism: expansion of ARED reveals AU-rich element cluster variations between human and mouse</b>                                                                      | A.S.Halees, R.El-Badrawi and K.S.A.Khabar                                                                                                                                                                                                                                                                                                                                                                 | D137–D140 |
| <b>GRSDB2 and GRS_UTRdb: databases of quadruplex forming G-rich sequences in pre-mRNAs and mRNAs</b>                                                                            | O.Kikin, Z.Zappala, L.D'Antonio and P.S.Bagga                                                                                                                                                                                                                                                                                                                                                             | D141–D148 |
| <b>The microRNA.org resource: targets and expression</b>                                                                                                                        | D.Betel, M.Wilson, A.Gabow, D.S.Marks and C.Sander                                                                                                                                                                                                                                                                                                                                                        | D149–D153 |
| <b>miRBase: tools for microRNA genomics</b>                                                                                                                                     | S.Griffiths-Jones, H.K.Saini, S.van Dongen and A.J.Enright                                                                                                                                                                                                                                                                                                                                                | D154–D158 |

*Continued*

|                                                                                                                              |                                                                                                                                        |           |
|------------------------------------------------------------------------------------------------------------------------------|----------------------------------------------------------------------------------------------------------------------------------------|-----------|
| <b>miRGator: an integrated system for functional annotation of microRNAs</b>                                                 | S.Nam, B.Kim, S.Shin and S.Lee                                                                                                         | D159–D164 |
| <b>miRNAMap 2.0: genomic maps of microRNAs in metazoan genomes</b>                                                           | S.-D.Hsu, C.-H.Chu, A.-P.Tsou, S.-J.Chen, H.-C.Chen, P.W.-C.Hsu, Y.-H.Wong, Y.-H.Chen, G.-H.Chen and H.-D.Huang                        | D165–D169 |
| <b>NONCODE v2.0: decoding the non-coding</b>                                                                                 | S.He, C.Liu, G.Skogerbø, H.Zhao, J.Wang, T.Liu, B.Bai, Y.Zhao and R.Chen                                                               | D170–D172 |
| <b>s piRNABank: a web resource on classified and clustered Piwi-interacting RNAs</b>                                         | S.Sai Lakshmi and S.Agrawal                                                                                                            | D173–D177 |
| <b>The 3D rRNA modification maps database: with interactive tools for ribosome analysis</b>                                  | D.Piekna-Przybylska, W.A.Decatur and M.J.Fournier                                                                                      | D178–D183 |
| <b>Vir-Mir db: prediction of viral microRNA candidate hairpins</b>                                                           | S.-C.Li, C.-K.Shiau and W.-c.Lin                                                                                                       | D184–D189 |
| <b>The Universal Protein Resource (UniProt)</b>                                                                              | The UniProt Consortium                                                                                                                 | D190–D195 |
| <b>MIPS: analysis and annotation of genome information in 2007</b>                                                           | H.W.Mewes, S.Dietmann, D.Frushman, R.Gregory, G.Mannhaupt, K.F.X.Mayer, M.Münsterkötter, A.Ruepp, M.Spannagl, V.Stümpflen and T.Rattei | D196–D201 |
| <b>AAindex: amino acid index database, progress report 2008</b>                                                              | S.Kawashima, P.Pokarowski, M.Pokarowska, A.Kolinski, T.Katayama and M.Kanehisa                                                         | D202–D205 |
| <b>CyBase: a database of cyclic protein sequences and structures, with applications in protein discovery and engineering</b> | C.K.L.Wang, Q.Kaas, L.Chiche and D.J.Craik                                                                                             | D206–D10  |
| <b>MALISAM: a database of structurally analogous motifs in proteins</b>                                                      | H.Cheng, B.-H.Kim and N.V.Grishin                                                                                                      | D211–D217 |
| <b>MegaMotifBase: a database of structural motifs in protein families and superfamilies</b>                                  | G.Pugalenthi, P.N.Suganthan, R.Sowdhamini and S.Chakrabarti                                                                            | D218–D221 |
| <b>PPT-DB: the protein property prediction and testing database</b>                                                          | D.S.Wishart, D.Arndt, M.Berjanskii, A.C.Guo, Y.Shi, S.Shrivastava, J.Zhou, Y.Zhou and G.Lin                                            | D222–D229 |
| <b>LOCATE: a mammalian protein subcellular localization database</b>                                                         | J.Sprenger, J.Lynn Fink, S.Karunaratne, K.Hanson, N.A.Hamilton and R.D.Teasdale                                                        | D230–D233 |
| <b>TOPDB: topology data bank of transmembrane proteins</b>                                                                   | G.E.Tusnády, L.Kalmár and I.Simon                                                                                                      | D234–D239 |
| <b>Phospho.ELM: a database of phosphorylation sites—update 2008</b>                                                          | F.Diella, C.M.Gould, C.Chica, A.Via and T.J.Gibson                                                                                     | D240–D244 |
| <b>The 20 years of PROSITE</b>                                                                                               | N.Hulo, A.Bairoch, V.Bulliard, L.Cerutti, B.A.Cuche, E.de Castro, C.Lachaize, P.S.Langendijk-Genevaux and C.J.A.Sigrist                | D245–D249 |
| <b>eggNOG: automated construction and annotation of orthologous groups of genes</b>                                          | L.J.Jensen, P.Julien, M.Kuhn, C.von Mering, J.Muller, T.Doerks and P.Bork                                                              | D250–D254 |
| <b>EPGD: a comprehensive web resource for integrating and displaying eukaryotic paralog/paralogue information</b>            | G.Ding, Y.Sun, H.Li, Z.Wang, H.Fan, C.Wang, D.Yang and Y.Li                                                                            | D255–D262 |
| <b>InParanoid 6: eukaryotic ortholog clusters with inparalogs</b>                                                            | A.-C.Berglund, E.Sjölund, G.Östlund and E.L.L.Sonnhammer                                                                               | D263–D266 |
| <b>OPTIC: orthologous and paralogous transcripts in clades</b>                                                               | A.Heger and C.P.Ponting                                                                                                                | D267–D270 |

*Continued*

|          |                                                                                                                                            |                                                                                                                                                                                 |           |
|----------|--------------------------------------------------------------------------------------------------------------------------------------------|---------------------------------------------------------------------------------------------------------------------------------------------------------------------------------|-----------|
|          | <b>OrthoDB: the hierarchical catalog of eukaryotic orthologs</b>                                                                           | E.V.Kriventseva, N.Rahman, O.Espinosa and E.M.Zdobnov                                                                                                                           | D271–D275 |
| <b>s</b> | <b>PairsDB atlas of protein sequence space</b>                                                                                             | A.Heger, E.Korpelainen, T.Hupponen, K.Mattila, V.Ollikainen and L.Holm                                                                                                          | D276–D280 |
|          | <b>The Pfam protein families database</b>                                                                                                  | R.D.Finn, J.Tate, J.Mistry, P.C.Coggill, S.J.Sammut, H.-R.Hotz, G.Ceric, K.Forslund, S.R.Eddy, E.L.L.Sonnhammer and A.Bateman                                                   | D281–D288 |
|          | <b>SIMAP—structuring the network of protein similarities</b>                                                                               | T.Rattei, P.Tischler, R.Arnold, F.Hamberger, J.Krebs, J.Krumsiek, B.Wachinger, V.Stümpflen and W.Mewes                                                                          | D289–D292 |
|          | <b>ATDB: a uni-database platform for animal toxins</b>                                                                                     | Q.-Y.He, Q.-Z.He, X.-C.Deng, L.Yao, E.Meng, Z.-H.Liu and S.-P.Liang                                                                                                             | D293–D297 |
| <b>s</b> | <b>ChromDB: The Chromatin Database</b>                                                                                                     | K.Gendler, T.Paulsen and C.Napoli                                                                                                                                               | D298–D302 |
|          | <b>DB-PABP: a database of polyanion-binding proteins</b>                                                                                   | J.Fang, Y.Dong, N.Salamat-Miller and C.R.Middaugh                                                                                                                               | D303–D306 |
|          | <b>Development of a heme protein structure–electrochemical function database</b>                                                           | C.J.Reedy, M.M.Elvekrog and B.R.Gibney                                                                                                                                          | D307–D313 |
|          | <b>KNOTTIN: the knottin or inhibitor cystine knot scaffold in 2007</b>                                                                     | J.Gracy, D.Le-Nguyen, J.-C.Gelly, Q.Kaas, A.Heitz and L.Chiche                                                                                                                  | D314–D319 |
|          | <b>MEROPS: the peptidase database</b>                                                                                                      | N.D.Rawlings, F.R.Morton, C.Y.Kok, J.Kong and A.J.Barrett                                                                                                                       | D320–D325 |
|          | <b>NORINE: a database of nonribosomal peptides</b>                                                                                         | S.Caboche, M.Pupin, V.Leclère, A.Fontaine, P.Jacques and G.Kucherov                                                                                                             | D326–D331 |
| <b>s</b> | <b>SelenoDB 1.0 : a database of selenoprotein genes, proteins and SECIS elements</b>                                                       | S.Castellano, V.N.Gladyshev, R.Guigó and M.J.Berry                                                                                                                              | D332–D338 |
|          | <b>The Telomerase Database</b>                                                                                                             | J.D.Podlevsky, C.J.Bley, R.V.Omana, X.Qi and J.J.-L.Chen                                                                                                                        | D339–D343 |
|          | <b>ChEBI: a database and ontology for chemical entities of biological interest</b>                                                         | K.Degtyarenko, P.de Matos, M.Ennis, J.Hastings, M.Zbinden, A.McNaught, R.Alcántara, M.Darsow, M.Guedj and M.Ashburner                                                           | D344–D350 |
|          | <b>ChemBank: a small-molecule screening and cheminformatics resource database</b>                                                          | K.P.Seiler, G.A.George, M.P.Happ, N.E.Bodycombe, H.A.Carrinski, S.Norton, S.Brudz, J.P.Sullivan, J.Muhlich, M.Serrano, P.Ferraiolo, N.J.Tolliday, S.L.Schreiber and P.A.Clemons | D351–D359 |
|          | <b>R.E.DD.B.: A database for RESP and ESP atomic charges, and force field libraries</b>                                                    | F.-Y.Dupradeau, C.Cézard, R.Lelong, É.Stanislawiak, J.Pécher, J.C.Delepine and P.Cieplak                                                                                        | D360–D367 |
|          | <b>Glycoconjugate Data Bank:Structures—an annotated glycan structure database and N-glycan primary structure verification service</b>      | T.Nakahara, R.Hashimoto, H.Nakagawa, K.Monde, N.Miura and S.-I.Nishimura                                                                                                        | D368–D371 |
| <b>s</b> | <b>Greglist: a database listing potential G-quadruplex regulated genes</b>                                                                 | R.Zhang, Y.Lin and C.-T.Zhang                                                                                                                                                   | D372–D376 |
|          | <b>The ITS2 Database II: homology modelling RNA structure for molecular systematics</b>                                                    | C.Selig, M.Wolf, T.Müller, T.Dandekar and J.Schultz                                                                                                                             | D377–D380 |
|          | <b>QuadBase: genome-wide database of G4 DNA—occurrence and conservation in human, chimpanzee, mouse and rat promoters and 146 microbes</b> | V.K.Yadav, J.K.Abraham, P.Mani, R.Kulshrestha and S.Chowdhury                                                                                                                   | D381–D385 |

*Continued*

|          |                                                                                                                                                                                                                                      |                                                                                                                                                                                                                                                                                                                             |           |
|----------|--------------------------------------------------------------------------------------------------------------------------------------------------------------------------------------------------------------------------------------|-----------------------------------------------------------------------------------------------------------------------------------------------------------------------------------------------------------------------------------------------------------------------------------------------------------------------------|-----------|
| <b>s</b> | <b>RNA FRABASE version 1.0: an engine with a database to search for the three-dimensional fragments within RNA structures</b>                                                                                                        | M.Popenda, M.Błażewicz, M.Szachniuk and R.W.Adamiak                                                                                                                                                                                                                                                                         | D386–D391 |
|          | <b>RNAJunction: a database of RNA junctions and kissing loops for three-dimensional structural analysis and nanodesign</b>                                                                                                           | E.Bindewald, R.Hayes, Y.G.Yingling, W.Kasprzak and B.A.Shapiro                                                                                                                                                                                                                                                              | D392–D397 |
|          | <b>AutoPSI: a database for automatic structural classification of protein sequences and structures</b>                                                                                                                               | F.Birzele, J.E.Gewehr and R.Zimmer                                                                                                                                                                                                                                                                                          | D398–D401 |
|          | <b>BioMagResBank</b>                                                                                                                                                                                                                 | E.L.Ulrich, H.Akutsu, J.F.Doreleijers, Y.Harano, Y.E.Ioannidis, J.Lin, M.Livny, S.Mading, D.Maziuk, Z.Miller, E.Nakatani, C.F.Schulte, D.E.Tolmie, R.K.Wenger, H.Yao and J.L.Markley                                                                                                                                        | D402–D408 |
|          | <b>coliSNP database server mapping nsSNPs on protein structures</b>                                                                                                                                                                  | H.Kono, T.Yuasa, S.Nishiue and K.Yura                                                                                                                                                                                                                                                                                       | D409–D413 |
| <b>s</b> | <b>Gene3D: comprehensive structural and functional annotation of genomes</b>                                                                                                                                                         | C.Yeats, J.Lees, A.Reid, P.Kellam, N.Martin, X.Liu and C.Orengo                                                                                                                                                                                                                                                             | D414–D418 |
|          | <b>Data growth and its impact on the SCOP database: new developments</b>                                                                                                                                                             | A.Andreeva, D.Howorth, J.-M.Chandonia, S.E.Brenner, T.J.P.Hubbard, C.Chothia and A.G.Murzin                                                                                                                                                                                                                                 | D419–D425 |
|          | <b>Remediation of the protein data bank archive</b>                                                                                                                                                                                  | K.Henrick, Z.Feng, W.F.Bluhm, D.Dimitropoulos, J.F.Doreleijers, S.Dutta, J.L.Fluppen-Anderson, J.Ionides, C.Kamada, E.Krissinel, C.L.Lawson, J.L.Markley, H.Nakamura, R.Newman, Y.Shimizu, J.Swaminathan, S.Velankar, J.Ory, E.L.Ulrich, W.Vranken, J.Westbrook, R.Yamashita, H.Yang, J.Young, M.Yousufuddin and H.M.Berman | D426–D433 |
|          | <b>FunSimMat: a comprehensive functional similarity database</b>                                                                                                                                                                     | A.Schlicker and M.Albrecht                                                                                                                                                                                                                                                                                                  | D434–D439 |
| <b>s</b> | <b>The Gene Ontology project in 2008</b>                                                                                                                                                                                             | The Gene Ontology Consortium                                                                                                                                                                                                                                                                                                | D440–D444 |
|          | <b>The HGNC Database in 2008: a resource for the human genome</b>                                                                                                                                                                    | E.A.Bruford, M.J.Lush, M.W.Wright, T.P.Sneddon, S.Povey and E.Birney                                                                                                                                                                                                                                                        | D445–D448 |
| <b>s</b> | <b>The Plant Ontology Database: a community resource for plant structure and developmental stages controlled vocabulary and annotations</b>                                                                                          | S.Avraham, C.-W.Tung, K.Ilic, P.Jaiswal, E.A.Kellogg, S.McCouch, A.Pujar, L.Reiser, S.Y.Rhee, M.M.Sachs, M.Schaeffer, L.Stein, P.Stevens, L.Vincent, F.Zapata and D.Ware                                                                                                                                                    | D449–D454 |
|          | <b>IDBD: Infectious Disease Biomarker Database</b>                                                                                                                                                                                   | I.S.Yang, C.Ryu, K.J.Cho, J.K.Kim, S.H.Ong, W.P.Mitchell, B.S.Kim, H.-B.Oh and K.H.Kim                                                                                                                                                                                                                                      | D455–D460 |
|          | <b>SuperCAT: a supertree database for combined and integrative multilocus sequence typing analysis of the <i>Bacillus cereus</i> group of bacteria (including <i>B. cereus</i>, <i>B. anthracis</i> and <i>B. thuringiensis</i>)</b> | N.J.Tourasse and A.-B.Kolstø                                                                                                                                                                                                                                                                                                | D461–D468 |
|          | <b>GenoList: an integrated environment for comparative analysis of microbial genomes</b>                                                                                                                                             | P.Lechat, L.Hummel, S.Rousseau and I.Moszer                                                                                                                                                                                                                                                                                 | D469–D474 |
|          | <b>The Genomes On Line Database (GOLD) in 2007: status of genomic and metagenomic projects and their associated metadata</b>                                                                                                         | K.Liolios, K.Mavromatis, N.Tavernarakis and N.C.Kyrpides                                                                                                                                                                                                                                                                    | D475–D479 |
|          | <b>KEGG for linking genomes to life and the environment</b>                                                                                                                                                                          | M.Kanehisa, M.Araki, S.Goto, M.Hattori, M.Hirakawa, M.Itoh, T.Katayama, S.Kawashima, S.Okuda, T.Tokimatsu and Y.Yamanishi                                                                                                                                                                                                   | D480–D484 |

Continued

# Contents (Continued)

Volume 36, Database issue, January 2008

|                                                                                                                              |                                                                                                                                                                                                                                                                                                                                  |           |
|------------------------------------------------------------------------------------------------------------------------------|----------------------------------------------------------------------------------------------------------------------------------------------------------------------------------------------------------------------------------------------------------------------------------------------------------------------------------|-----------|
| <b>s</b> Narcisse: a mirror view of conserved syntenies                                                                      | E.Courcelle, Y.Beausse, S.Letort, O.Stahl, R.Fremez, C.Ngom-Bru, J.Gouzy and T.Faraut                                                                                                                                                                                                                                            | D485–D490 |
| PhylomeDB: a database for genome-wide collections of gene phylogenies                                                        | J.Huerta-Cepas, A.Bueno, J.Dopazo and T.Gabaldón                                                                                                                                                                                                                                                                                 | D491–D496 |
| <b>s</b> BioHealthBase: informatics support in the elucidation of influenza virus host–pathogen interactions and virulence   | B.Squires, C.Macken, A.Garcia-Sastre, S.Godbole, J.Noronha, V.Hunt, R.Chang, C.N.Larsen, E.Klem, K.Biersack and R.H.Scheuermann                                                                                                                                                                                                  | D497–D503 |
| CoVDB: a comprehensive database for comparative analysis of coronavirus genes and genomes                                    | Y.Huang, S.K.P.Lau, P.C.Y.Woo and K.-y.Yuen                                                                                                                                                                                                                                                                                      | D504–D511 |
| The hepatitis C sequence database in Los Alamos                                                                              | C.Kuiken, P.Hraber, J.Thurmond and K.Yusim                                                                                                                                                                                                                                                                                       | D512–D516 |
| AlterORF: a database of alternate open reading frames                                                                        | I.Pedroso, G.Rivera, F.Lazo, M.Chacón, F.Ossandón, F.A.Veloso and D.S.Holmes                                                                                                                                                                                                                                                     | D517–D518 |
| Enteropathogen Resource Integration Center (ERIC): bioinformatics support for research on biodefense-relevant enterobacteria | J.D.Glasner, G.Plunkett III, B.D.Anderson, D.J.Baumler, B.S.Biehl, V.Burland, E.L.Cabot, A.E.Darling, B.Mau, E.C.Neeno-Eckwall, D.Pot, Y.Qiu, A.I.Rissman, S.Worzella, S.Zaremba, J.Fedorko, T.Hampton, P.Liss, M.Rusch, M.Shaker, L.Shaull, P.Shetty, S.Thotakura, J.Whitmore, F.R.Blattner, J.M.Greene and N.T.Perna           | D519–D523 |
| HEG-DB: a database of predicted highly expressed genes in prokaryotic complete genomes under translational selection         | P.Puigbò, A.Romeu and S.Garcia-Vallvé                                                                                                                                                                                                                                                                                            | D524–D527 |
| The integrated microbial genomes (IMG) system in 2007: data content and analysis tool extensions                             | V.M.Markowitz, E.Szeto, K.Palaniappan, Y.Grechkin, K.Chu, I.-M.A.Chen, I.Dubchak, I.Anderson, A.Lykidis, K.Mavromatis, N.N.Ivanova and N.C.Kyrpides                                                                                                                                                                              | D528–D533 |
| IMG/M: a data management and analysis system for metagenomes                                                                 | V.M.Markowitz, N.N.Ivanova, E.Szeto, K.Palaniappan, K.Chu, D.Dalevi, I.-M.A.Chen, Y.Grechkin, I.Dubchak, I.Anderson, A.Lykidis, K.Mavromatis, P.Hugenholtz and N.C.Kyrpides                                                                                                                                                      | D534–D538 |
| VFDB 2008 release: an enhanced web-based resource for comparative pathogenomics                                              | J.Yang, L.Chen, L.Sun, J.Yu and Q.Jin                                                                                                                                                                                                                                                                                            | D539–D542 |
| xBASE2: a comprehensive resource for comparative bacterial genomics                                                          | R.R.Chaudhuri, N.J.Loman, L.A.S.Snyder, C.M.Bailey, D.J.Stekel and M.J.Pallen                                                                                                                                                                                                                                                    | D543–D546 |
| ProtozoaDB: dynamic visualization and exploration of protozoan genomes                                                       | A.M.R.Dávila, P.N.Mendes, G.Wagner, D.A.Tschoeke, R.R.C.Cuadrat, F.Liberman, L.Matos, T.Satake, K.A.C.S.Ocaña, O.Triana, S.M.S.Cruz, H.C.L.Jucá, J.C.Cury, F.N.Silva, G.A.Geronimo, M.Ruiz, E.Ruback, F.P.Silva Jr, C.M.Probst, E.C.Grisard, M.A.Krieger, S.Goldenberg, M.C.R.Cavalcanti, M.O.Moraes, M.L.M.Campos and M.Mattoso | D547–D552 |
| ToxoDB: an integrated <i>Toxoplasma gondii</i> database resource                                                             | B.Gajria, A.Bahl, J.Brestelli, J.Dommer, S.Fischer, X.Gao, M.Heiges, J.Iodice, J.C.Kissinger, A.J.Mackey, D.F.Pinney, D.S.Roos, C.J.Stoeckert Jr, H.Wang and B.P.Brunk                                                                                                                                                           | D553–D556 |
| CandidaDB: a multi-genome database for <i>Candida</i> species and related <i>Saccharomycotina</i>                            | T.Rossignol, P.Lechat, C.Cuomo, Q.Zeng, I.Moszer and C.d'Enfert                                                                                                                                                                                                                                                                  | D557–D561 |

Continued

|                                                                                                                                        |                                                                                                                                                                                                                                                                                                                                                                             |           |
|----------------------------------------------------------------------------------------------------------------------------------------|-----------------------------------------------------------------------------------------------------------------------------------------------------------------------------------------------------------------------------------------------------------------------------------------------------------------------------------------------------------------------------|-----------|
| <b>CFGP: a web-based, comparative fungal genomics platform</b>                                                                         | J.Park, B.Park, K.Jung, S.Jang, K.Yu, J.Choi, S.Kong, J.Park, S.Kim, H.Kim, S.Kim, J.F.Kim, J.E.Blair, K.Lee, S.Kang and Y.-H.Lee                                                                                                                                                                                                                                           | D562–D571 |
| <b>PHI-base update: additions to the pathogen–host interaction database</b>                                                            | R.Winnenburg, M.Urban, A.Beacham, T.K.Baldwin, S.Holland, M.Lindeberg, H.Hansen, C.Rawlings, K.E.Hammond-Kosack and J.Köhler                                                                                                                                                                                                                                                | D572–D576 |
| <b>Gene Ontology annotations at SGD: new data sources and annotation methods</b>                                                       | E.L.Hong, R.Balakrishnan, Q.Dong, K.R.Christie, J.Park, G.Binkley, M.C.Costanzo, S.S.Dwight, S.R.Engel, D.G.Fisk, J.E.Hirschman, B.C.Hitz, C.J.Krieger, M.S.Livstone, S.R.Miyasato, R.S.Nash, R.Oughtred, M.S.Skrzypek, S.Weng, E.D.Wong, K.K.Zhu, K.Dolinski, D.Botstein and J.M.Cherry                                                                                    | D577–D581 |
| <b>ButterflyBase: a platform for lepidopteran genomics</b>                                                                             | A.Papanicolaou, S.Gebauer-Jung, M.L.Blaxter, W.Owen McMillan and C.D.Jiggins                                                                                                                                                                                                                                                                                                | D582–D587 |
| <b>FlyBase: integration and improvements to query tools</b>                                                                            | R.J.Wilson, J.L.Goodman, V.B.Strelets and The FlyBase Consortium                                                                                                                                                                                                                                                                                                            | D588–D593 |
| <b>REDfly 2.0: an integrated database of <i>cis</i>-regulatory modules and transcription factor binding sites in <i>Drosophila</i></b> | M.S.Halfon, S.M.Gallo and C.M.Bergman                                                                                                                                                                                                                                                                                                                                       | D594–D598 |
| <b>SmedGD: the <i>Schmidtea mediterranea</i> genome database</b>                                                                       | S.M.C.Robb, E.Ross and A.S.Alvarado                                                                                                                                                                                                                                                                                                                                         | D599–D606 |
| <b>Upgrades to <i>StellaBase</i> facilitate medical and genetic studies on the starlet sea anemone, <i>Nematostella vectensis</i></b>  | J.C.Sullivan, A.M.Reitzel and J.R.Finnerty                                                                                                                                                                                                                                                                                                                                  | D607–D611 |
| <b>WormBase 2007</b>                                                                                                                   | A.Rogers, I.Antoshechkin, T.Bieri, D.Blasiar, C.Bastiani, P.Canaran, J.Chan, W.J.Chen, P.Davis, J.Fernandes, T.J.Fiedler, M.Han, T.W.Harris, R.Kishore, R.Lee, S.McKay, H.-M.Müller, C.Nakamura, P.Ozersky, A.Petcherski, G.Schindelman, E.M.Schwarz, W.Spooner, M.A.Tuli, K.Van Auken, D.Wang, X.Wang, G.Williams, K.Yook, R.Durbin, L.D.Stein, J.Spieth and P.W.Sternberg | D612–D617 |
| <b>PROCOGNATE: a cognate ligand domain mapping for enzymes</b>                                                                         | M.Bashton, I.Nobeli and J.M.Thornton                                                                                                                                                                                                                                                                                                                                        | D618–D622 |
| <b>s The MetaCyc Database of metabolic pathways and enzymes and the BioCyc collection of Pathway/Genome Databases</b>                  | R.Caspi, H.Foerster, C.A.Fulcher, P.Kaipa, M.Krummenacker, M.Latendresse, S.Paley, S.Y.Rhee, A.G.Shearer, C.Tissier, T.C.Walk, P.Zhang and P.D.Karp                                                                                                                                                                                                                         | D623–D631 |
| <b>Bacteriome.org—an integrated protein interaction database for <i>E. coli</i></b>                                                    | C.Su, J.M.Peregrin-Alvarez, G.Butland, S.Phanse, V.Fong, A.Emili and J.Parkinson                                                                                                                                                                                                                                                                                            | D632–D636 |
| <b>The BioGRID Interaction Database: 2008 update</b>                                                                                   | B.-J.Breitkreutz, C.Stark, T.Reguly, L.Boucher, A.Breitkreutz, M.Livstone, R.Oughtred, D.H.Lackner, J.Bähler, V.Wood, K.Dolinski and M.Tyers                                                                                                                                                                                                                                | D637–D640 |
| <b>The cell cycle DB: a systems biology approach to cell cycle analysis</b>                                                            | R.Alfieri, I.Merelli, E.Mosca and L.Milanesi                                                                                                                                                                                                                                                                                                                                | D641–D645 |
| <b>CORUM: the comprehensive resource of mammalian protein complexes</b>                                                                | A.Ruepp, B.Brauner, I.Dunger-Kaltenbach, G.Frishman, C.Montrone, M.Stransky, B.Waegele, T.Schmidt, O.N.Doudieu, V.Stümpflen and H.W.Mewes                                                                                                                                                                                                                                   | D646–D650 |

Continued

|          |                                                                                                                                |                                                                                                                                                                                                                                                                                                                                                                                                                                                                                                                                                                                                                                                            |           |
|----------|--------------------------------------------------------------------------------------------------------------------------------|------------------------------------------------------------------------------------------------------------------------------------------------------------------------------------------------------------------------------------------------------------------------------------------------------------------------------------------------------------------------------------------------------------------------------------------------------------------------------------------------------------------------------------------------------------------------------------------------------------------------------------------------------------|-----------|
|          | <b>DIMA 2.0—predicted and known domain interactions</b>                                                                        | P.Pagel, M.Oesterheld, O.Tovstukhina, N.Strack, V.Stümpflen and D.Frishman                                                                                                                                                                                                                                                                                                                                                                                                                                                                                                                                                                                 | D651–D655 |
| <b>s</b> | <b>DOMINE: a database of protein domain interactions</b>                                                                       | B.Raghavachari, A.Tasneem, T.M.Przytycka and R.Jothi                                                                                                                                                                                                                                                                                                                                                                                                                                                                                                                                                                                                       | D656–D661 |
|          | <b>HotSprint: database of computational hot spots in protein interfaces</b>                                                    | E.Guney, N.Tuncbag, O.Keskin and A.Gursoy                                                                                                                                                                                                                                                                                                                                                                                                                                                                                                                                                                                                                  | D662–D666 |
|          | <b>LigASite—a database of biologically relevant binding sites in proteins with known <i>apo</i>-structures</b>                 | B.H.Dessailly, M.F.Lensink, C.A.Orengo and S.J.Wodak                                                                                                                                                                                                                                                                                                                                                                                                                                                                                                                                                                                                       | D667–D673 |
|          | <b>Binding MOAD, a high-quality protein–ligand database</b>                                                                    | M.L.Benson, R.D.Smith, N.A.Khazanov, B.Dimcheff, J.Beaver, P.Dresslar, J.Nerothin and H.A.Carlson                                                                                                                                                                                                                                                                                                                                                                                                                                                                                                                                                          | D674–D678 |
|          | <b>PepCyber:P~PEP: a database of human protein–protein interactions mediated by phosphoprotein-binding domains</b>             | W.Gong, D.Zhou, Y.Ren, Y.Wang, Z.Zuo, Y.Shen, F.Xiao, Q.Zhu, A.Hong, X.Zhou, X.Gao and T.Li                                                                                                                                                                                                                                                                                                                                                                                                                                                                                                                                                                | D679–D683 |
|          | <b>STITCH: interaction networks of chemicals and proteins</b>                                                                  | M.Kuhn, C.von Mering, M.Campillos, L.J.Jensen and P.Bork                                                                                                                                                                                                                                                                                                                                                                                                                                                                                                                                                                                                   | D684–D688 |
|          | <b>EndoNet: an information resource about regulatory networks of cell-to-cell communication</b>                                | J.Dönitz, B.Goemann, M.Lizé, H.Michael, N.Sasse, E.Wingender and A.P.Potapov                                                                                                                                                                                                                                                                                                                                                                                                                                                                                                                                                                               | D689–D694 |
|          | <b>NetworKIN: a resource for exploring cellular phosphorylation networks</b>                                                   | R.Linding, L.Juhl Jensen, A.Pasulescu, M.Olhovsky, K.Colwill, P.Bork, M.B.Yaffe and T.Pawson                                                                                                                                                                                                                                                                                                                                                                                                                                                                                                                                                               | D695–D699 |
|          | <b>The Molecule Pages database</b>                                                                                             | B.Saunders, S.Lyon, M.Day, B.Riley, E.Chenette and S.Subramaniam                                                                                                                                                                                                                                                                                                                                                                                                                                                                                                                                                                                           | D700–D706 |
|          | <b>Ensembl 2008</b>                                                                                                            | P.Flicek, B.L.Aken, K.Beal, B.Ballester, M.Caccamo, Y.Chen, L.Clarke, G.Coates, F.Cunningham, T.Cutts, T.Down, S.C.Dyer, T.Eyre, S.Fitzgerald, J.Fernandez-Banet, S.Gräf, S.Haider, M.Hammond, R.Holland, K.L.Howe, K.Howe, N.Johnson, A.Jenkinson, A.Kähäri, D.Keefe, F.Kokocinski, E.Kulesha, D.Lawson, I.Longden, K.Megy, P.Meidl, B.Overduin, A.Parker, B.Pritchard, A.Prlic, S.Rice, D.Rios, M.Schuster, I.Sealy, G.Slater, D.Smedley, G.Spudich, S.Trevanion, A.J.Vilella, J.Vogel, S.White, M.Wood, E.Birney, T.Cox, V.Curwen, R.Durbin, X.M.Fernandez-Suarez, J.Herrero, T.J.P.Hubbard, A.Kasprzyk, G.Proctor, J.Smith, A.Ureta-Vidal and S.Searle | D707–D714 |
|          | <b>EuroPhenome and EMPReSS: online mouse phenotyping resource</b>                                                              | A.-M.Mallon, A.Blake and J.M.Hancock                                                                                                                                                                                                                                                                                                                                                                                                                                                                                                                                                                                                                       | D715–D718 |
|          | <b>Gallus GBrowse: a unified genomic database for the chicken</b>                                                              | C.J.Schmidt, M.Romanov, O.Ryder, V.Magrini, M.Hickenbotham, J.Glasscock, S.McGrath, E.Mardis and L.D.Stein                                                                                                                                                                                                                                                                                                                                                                                                                                                                                                                                                 | D719–D723 |
|          | <b>The Mouse Genome Database (MGD): mouse biology and model systems</b>                                                        | C.J.Bult, J.T.Eppig, J.A.Kadin, J.E.Richardson, J.A.Blake and the Mouse Genome DatabaseGroup                                                                                                                                                                                                                                                                                                                                                                                                                                                                                                                                                               | D724–D728 |
|          | <b>PBmice: an integrated database system of <i>piggyBac</i> (PB) insertional mutations and their characterizations in mice</b> | L.V.Sun, K.Jin, Y.Liu, W.Yang, X.Xie, L.Ye, L.Wang, L.Zhu, S.Ding, Y.Su, J.Zhou, M.Han, Y.Zhuang, T.Xu, X.Wu, N.Gu and Y.Zhong                                                                                                                                                                                                                                                                                                                                                                                                                                                                                                                             | D729–D734 |

*Continued*

|                                                                                                                                        |                                                                                                                                                                                                                                                                                                                                                                                                                  |           |
|----------------------------------------------------------------------------------------------------------------------------------------|------------------------------------------------------------------------------------------------------------------------------------------------------------------------------------------------------------------------------------------------------------------------------------------------------------------------------------------------------------------------------------------------------------------|-----------|
| <b>TreeFam: 2008 Update</b>                                                                                                            | J.Ruan, H.Li, Z.Chen, A.Coghlan, L.J.M.Coin, Y.Guo, J.-K.Hériché, Y.Hu, K.Kristiansen, R.Li, T.Liu, A.Moses, J.Qin, S.Vang, A.J.Vilella, A.Ureta-Vidal, L.Bolund, J.Wang and R.Durbin                                                                                                                                                                                                                            | D735–D740 |
| <b>The UniTrap resource: tools for the biologist enabling optimized use of gene trap clones</b>                                        | G.Roma, M.Sardiello, G.Cobellis, P.Cruz, G.Lago, R.Sanges and E.Stupka                                                                                                                                                                                                                                                                                                                                           | D741–D746 |
| <b>UTGB/medaka: genomic resource database for medaka biology</b>                                                                       | B.Ahsan, D.Kobayashi, T.Yamada, M.Kasahara, S.Sasaki, T.L.Saito, Y.Nagayasu, K.Doi, Y.Nakatani, W.Qu, T.Jindo, A.Shimada, K.Naruse, A.Toyoda, Y.Kuroki, A.Fujiyama, T.Sasaki, A.Shimizu, S.Asakawa, N.Shimizu, S.-i.Hashimoto, J.Yang, Y.Lee, K.Matsushima, S.Sugano, M.Sakaizumi, T.Narita, K.Ohishi, S.Haga, F.Ohta, H.Nomoto, K.Nogata, T.Morishita, T.Endo, T.Shin-I, H.Takeda, Y.Kohara and S.Morishita     | D747–D752 |
| <b>The vertebrate genome annotation (Vega) database</b>                                                                                | L.G.Wilming, J.G.R.Gilbert, K.Howe, S.Trevanion, T.Hubbard and J.L.Harrow                                                                                                                                                                                                                                                                                                                                        | D753–D760 |
| <b>Xenbase: a <i>Xenopus</i> biology and genomics resource</b>                                                                         | J.B.Bowes, K.A.Snyder, E.Segerdell, R.Gibb, C.Jarabek, E.Noumen, N.Pollet and P.D.Vize                                                                                                                                                                                                                                                                                                                           | D761–D767 |
| <b>The Zebrafish Information Network: the zebrafish model organism database provides expanded support for genotypes and phenotypes</b> | J.Sprague, L.Bayraktaroglu, Y.Bradford, T.Conlin, N.Dunn, D.Fashena, K.Frazer, M.Haendel, D.G.Howe, J.Knight, P.Mani, S.A.T.Moxon, C.Pich, S.Ramachandran, K.Schaper, E.Segerdell, X.Shao, A.Singer, P.Song, B.Sprunger, C.E.Van Slyke and M.Westerfield                                                                                                                                                         | D768–D772 |
| <b>The UCSC Genome Browser Database: 2008 update</b>                                                                                   | D.Karolchik, R.M.Kuhn, R.Baertsch, G.P.Barber, H.Clawson, M.Diekhans, B.Giardine, R.A.Harte, A.S.Hinrichs, F.Hsu, K.M.Kober, W.Miller, J.S.Pedersen, A.Pohl, B.J.Raney, B.Rhead, K.R.Rosenbloom, K.E.Smith, M.Stanke, A.Thakkapallayil, H.Trumbower, T.Wang, A.S.Zweig, D.Haussler and W.J.Kent                                                                                                                  | D773–D779 |
| <b>X:Map: annotation and visualization of genome structure for Affymetrix exon array analysis</b>                                      | T.Yates, M.J.Okoniewski and C.J.Miller                                                                                                                                                                                                                                                                                                                                                                           | D780–D786 |
| <b>Evola: Ortholog database of all human genes in H-InvDB with manual curation of phylogenetic trees</b>                               | A.Matsuya, R.Sakate, Y.Kawahara, K.O.Koyanagi, Y.Sato, Y.Fujii, C.Yamasaki, T.Habara, H.Nakaoka, F.Todokoro, K.Yamaguchi, T.Endo, S.Oota, W.Makalowski, K.Ikeo, Y.Suzuki, K.Hanada, K.Hashimoto, M.Hirai, H.Iwama, N.Saitou, A.T.Hiraki, L.Jin, Y.Kaneko, M.Kanno, K.Murakami, A.O.Noda, N.Saichi, R.Sanbonmatsu, M.Suzuki, J.-i.Takeda, M.Tanaka, T.Gojobori, T.Imanishi and T.Itoh                             | D787–D792 |
| <b>The H-Invitational Database (H-InvDB), a comprehensive annotation resource for human genes and transcripts</b>                      | C.Yamasaki, K.Murakami, Y.Fujii, Y.Sato, E.Harada, J.-i.Takeda, T.Taniya, R.Sakate, S.Kikugawa, M.Shimada, M.Tanino, K.O.Koyanagi, R.A.Barrero, C.Gough, H.-W.Chun, T.Habara, H.Hanaoka, Y.Hayakawa, P.B.Hilton, Y.Kaneko, M.Kanno, Y.Kawahara, T.Kawamura, A.Matsuya, N.Nagata, K.Nishikata, A.O.Noda, S.Nurimoto, N.Saichi, H.Sakai, R.Sanbonmatsu, R.Shiba, M.Suzuki, K.Takabayashi, A.Takahashi and T.Tamura | D793–D799 |

Continued

|          |                                                                                                                                                                                                                                                                                                                                                                                                                                                                                                                                                                                                                                                                                                                                                                                                                                                                                                                                                                                                                                                                                                                                                             |           |
|----------|-------------------------------------------------------------------------------------------------------------------------------------------------------------------------------------------------------------------------------------------------------------------------------------------------------------------------------------------------------------------------------------------------------------------------------------------------------------------------------------------------------------------------------------------------------------------------------------------------------------------------------------------------------------------------------------------------------------------------------------------------------------------------------------------------------------------------------------------------------------------------------------------------------------------------------------------------------------------------------------------------------------------------------------------------------------------------------------------------------------------------------------------------------------|-----------|
|          | M.Tanaka, S.Tanaka, F.Todokoro, K.Yamaguchi, N.Yamamoto, T.Okido, J.Mashima, A.Hashizume, L.Jin, K.-B.Lee, Y.-C.Lin, A.Nozaki, K.Sakai, M.Tada, S.Miyazaki, T.Makino, H.Ohyanagi, N.Osato, N.Tanaka, Y.Suzuki, K.Ikeo, N.Saitou, H.Sugawara, C.O'Donovan, T.Kulikova, E.Whitfield, B.Halligan, M.Shimoyama, S.Twigger, K.Yura, K.Kimura, T.Yasuda, T.Nishikawa, Y.Akiyama, C.Motono, Y.Mukai, H.Nagasaki, M.Suwa, P.Horton, R.Kikuno, O.Ohara, D.Lancet, E.Eveno, E.Graudens, S.Imbeaud, M.A.Debily, Y.Hayashizaki, C.Amid, M.Han, A.Osanger, T.Endo, M.A.Thomas, M.Hirakawa, W.Makalowski, M.Nakao, N.-S.Kim, H.-S.Yoo, S.J.De Souza, M.de Fatima Bonaldo, Y.Niimura, V.Kuryshhev, I.Schupp, S.Wiemann, M.Bellgard, M.Shionyu, L.Jia, D.Thierry-Mieg, J.Thierry-Mieg, L.Wagner, Q.Zhang, M.Go, S.Minoshima, M.Ohtsubo, K.Hanada, P.Tonellato, T.Isogai, J.Zhang, B.Lenhard, S.Kim, Z.Chen, U.Hinz, A.Estreicher, K.Nakai, I.Makalowska, W.Hide, N.Tiffin, L.Wilming, R.Chakraborty, M.B.Souares, M.L.Chiusano, Y.Suzuki, C.Auffray, Y.Yamaguchi-Kabata, T.Itoh, T.Hishiki, S.Fukuchi, K.Nishikawa, S.Sugano, N.Nomura, Y.Tateno, T.Imanishi and T.Gojobori |           |
|          | G.C.Nickel, D.Tefft and M.D.Adams                                                                                                                                                                                                                                                                                                                                                                                                                                                                                                                                                                                                                                                                                                                                                                                                                                                                                                                                                                                                                                                                                                                           | D800–D808 |
|          | J.Lange, H.Skaletsky, G.W.Bell and D.C.Page                                                                                                                                                                                                                                                                                                                                                                                                                                                                                                                                                                                                                                                                                                                                                                                                                                                                                                                                                                                                                                                                                                                 | D809–D814 |
|          | A.Singh, A.Olowoyeye, P.H.Baenziger, J.Dantzer, M.G.Kann, P.Radivojac, R.Heiland and S.D.Mooney                                                                                                                                                                                                                                                                                                                                                                                                                                                                                                                                                                                                                                                                                                                                                                                                                                                                                                                                                                                                                                                             | D815–D819 |
|          | P.H.Lee and H.Shatkay                                                                                                                                                                                                                                                                                                                                                                                                                                                                                                                                                                                                                                                                                                                                                                                                                                                                                                                                                                                                                                                                                                                                       | D820–D824 |
| <b>s</b> | J.Reumers, L.Conde, I.Medina, S.Maurer-Stroh, J.Van Durme, J.Dopazo, F.Rousseau and J.Schymkowitz                                                                                                                                                                                                                                                                                                                                                                                                                                                                                                                                                                                                                                                                                                                                                                                                                                                                                                                                                                                                                                                           | D825–D829 |
|          | I.Scheinin, S.Myllykangas, I.Borze, T.Böhling, S.Knuutila and J.Saharinen                                                                                                                                                                                                                                                                                                                                                                                                                                                                                                                                                                                                                                                                                                                                                                                                                                                                                                                                                                                                                                                                                   | D830–D835 |
|          | X.He, S.Chang, J.Zhang, Q.Zhao, H.Xiang, K.Kusonmano, L.Yang, Z.S.Sun, H.Yang and J.Wang                                                                                                                                                                                                                                                                                                                                                                                                                                                                                                                                                                                                                                                                                                                                                                                                                                                                                                                                                                                                                                                                    | D836–D841 |
|          | M.Ongenaert, L.Van Neste, T.De Meyer, G.Menschaert, S.Bekaert and W.Van Crielinge                                                                                                                                                                                                                                                                                                                                                                                                                                                                                                                                                                                                                                                                                                                                                                                                                                                                                                                                                                                                                                                                           | D842–D846 |
|          | Y.Haudry, H.Berube, I.Letunic, P.-D.Weeber, J.Gagneur, C.Girardot, M.Kapushesky, D.Arendt, P.Bork, A.Brazma, E.E.M.Furlong, J.Wittbrodt and T.Henrich                                                                                                                                                                                                                                                                                                                                                                                                                                                                                                                                                                                                                                                                                                                                                                                                                                                                                                                                                                                                       | D847–D853 |

*Continued*

|                                                                                                                                                             |                                                                                                                                                                                                                                                                                   |           |
|-------------------------------------------------------------------------------------------------------------------------------------------------------------|-----------------------------------------------------------------------------------------------------------------------------------------------------------------------------------------------------------------------------------------------------------------------------------|-----------|
| <b>Cyclebase.org—a comprehensive multi-organism online database of cell-cycle experiments</b>                                                               | N.P.Gauthier, M.E.Larsen, R.Wernersson, U.de Lichtenberg, L.J.Jensen, S.Brunak and T.S.Jensen                                                                                                                                                                                     | D854–D859 |
| <b>EMAGE—Edinburgh Mouse Atlas of Gene Expression: 2008 update</b>                                                                                          | S.Venkataraman, P.Stevenson, Y.Yang, L.Richardson, N.Burton, T.P.Perry, P.Smith, R.A.Baldock, D.R.Davidson and J.H.Christiansen                                                                                                                                                   | D860–D865 |
| <b>Many Microbe Microarrays Database: uniformly normalized Affymetrix compendia with structured experimental metadata</b>                                   | J.J.Faith, M.E.Driscoll, V.A.Fusaro, E.J.Cosgrove, B.Hayete, F.S.Juhn, S.J.Schneider and T.S.Gardner                                                                                                                                                                              | D866–D870 |
| <b>The Stanford Tissue Microarray Database</b>                                                                                                              | R.J.Marinelli, K.Montgomery, C.L.Liu, N.H.Shah, W.Prapong, M.Nitzberg, Z.K.Zachariah, G.J.Sherlock, Y.Natkunam, R.B.West, M.van de Rijn, P.O.Brown and C.A.Ball                                                                                                                   | D871–D877 |
| <b>PRIDE: new developments and new datasets</b>                                                                                                             | P.Jones, R.G.Côté, S.Y.Cho, S.Klie, L.Martens, A.F.Quinn, D.Thorneycroft and H.Hermjakob                                                                                                                                                                                          | D878–D883 |
| <b>An emerging cyberinfrastructure for biodefense pathogen and pathogen–host data</b>                                                                       | C.Zhang, O.Crasta, S.Cammer, R.Will, R.Kenyon, D.Sullivan, Q.Yu, W.Sun, R.Jha, D.Liu, T.Xue, Y.Zhang, M.Moore, P.McGarvey, H.Huang, Y.Chen, J.Zhang, R.Mazumder, C.Wu and B.Sobral                                                                                                | D884–D891 |
| <b>CEBS—Chemical Effects in Biological Systems: a public data repository integrating study design and toxicity data with microarray and proteomics data</b> | M.Waters, S.Stasiewicz, B.Alex Merrick, K.Tomer, P.Bushel, R.Paules, N.Stegman, G.Nehls, K.J.Yost, C.H.Johnson, S.F.Gustafson, S.Xirasagar, N.Xiao, C.-C.Huang, P.Boyer, D.D.Chan, Q.Pan, H.Gong, J.Taylor, D.Choi, A.Rashid, A.Ahmed, R.Howle, J.Selkirk, R.Tennant and J.Fostel | D892–D900 |
| <b>DrugBank: a knowledgebase for drugs, drug actions and drug targets</b>                                                                                   | D.S.Wishart, C.Knox, A.C.Guo, D.Cheng, S.Shrivastava, D.Tzur, B.Gautam and M.Hassanali                                                                                                                                                                                            | D901–D906 |
| <b>GLIDA: GPCR—ligand database for chemical genomics drug discovery—database and tools update</b>                                                           | Y.Okuno, A.Tamon, H.Yabuuchi, S.Nijjima, Y.Minowa, K.Tonomura, R.Kunimoto and C.Feng                                                                                                                                                                                              | D907–D912 |
| <b>The pharmacogenetics and pharmacogenomics knowledge base: accentuating the knowledge</b>                                                                 | T.Hernandez-Boussard, M.Whirl-Carrillo, J.M.Hebert, L.Gong, R.Owen, M.Gong, W.Gor, F.Liu, C.Truong, R.Whaley, M.Woon, T.Zhou, R.B.Altman and T.E.Klein                                                                                                                            | D913–D918 |
| <b>SuperTarget and Matador: resources for exploring drug-target relationships</b>                                                                           | S.Günther, M.Kuhn, M.Dunkel, M.Campillos, C.Senger, E.Petsalaki, J.Ahmed, E.G.Urdiales, A.Gewiess, L.J.Jensen, R.Schneider, R.Skoblo, R.B.Russell, P.E.Bourne, P.Bork and R.Preissner                                                                                             | D919–D922 |
| <b>VIOLIN: vaccine investigation and online information network</b>                                                                                         | Z.Xiang, T.Todd, K.P.Ku, B.L.Kovacic, C.B.Larson, F.Chen, A.P.Hodges, Y.Tian, E.A.Olenzek, B.Zhao, L.A.Colby, H.G.Rush, J.R.Gilsdorf, G.W.Jouradian and Y.He                                                                                                                      | D923–D928 |
| <b>The plant organelles database (PODB): a collection of visualized plant organelles and protocols for plant organelle research</b>                         | S.Mano, T.Miwa, S.-i.Nishikawa, T.Mimura and M.Nishimura                                                                                                                                                                                                                          | D929–D937 |

*Continued*

|                                                                                                                                                |                                                                                                                                                                                                                             |             |
|------------------------------------------------------------------------------------------------------------------------------------------------|-----------------------------------------------------------------------------------------------------------------------------------------------------------------------------------------------------------------------------|-------------|
| <b>Mitome: dynamic and interactive database for comparative mitochondrial genomics in metazoan animals</b>                                     | Y.S.Lee, J.Oh, Y.U.Kim, N.Kim, S.Yang and U.W.Hwang                                                                                                                                                                         | D938–D942   |
| <b>The Generation Challenge Programme comparative plant stress-responsive gene catalogue</b>                                                   | S.Wanchana, S.Thongjuea, V.J.Ulat, M.Anacleto, R.Mauleon, M.Conte, M.Rouard, M.Ruiz, N.Krishnamurthy, K.Sjolander, T.van Hintum and R.M.Bruskiewich                                                                         | D943–D946   |
| <b>Gramene: a growing plant comparative genomics resource</b>                                                                                  | C.Liang, P.Jaiswal, C.Hebbard, S.Avraham, E.S.Buckler, T.Casstevens, B.Hurwitz, S.McCouch, J.Ni, A.Pujar, D.Ravenscroft, L.Ren, W.Spooner, I.Teclé, J.Thomason, C.-w.Tung, X.Wei, I.Yap, K.Youens-Clark, D.Ware and L.Stein | D947–D953   |
| <b>MetaCrop: a detailed database of crop plant metabolism</b>                                                                                  | E.Grafahrend-Belau, S.Weise, D.Koschützki, U.Scholz, B.H.Junker and F.Schreiber                                                                                                                                             | D954–D958   |
| <b>PlantGDB: a resource for comparative plant genomics</b>                                                                                     | J.Duvick, A.Fu, U.Muppurala, M.Sabharwal, M.D.Wilkerson, C.J.Lawrence, C.Lushbough and V.Brendel                                                                                                                            | D959–D965   |
| <b>PlantTFDB: a comprehensive plant transcription factor database</b>                                                                          | A.-Y.Guo, X.Chen, G.Gao, H.Zhang, Q.-H.Zhu, X.-C.Liu, Y.-F.Zhong, X.Gu, K.He and J.Luo                                                                                                                                      | D966–D969   |
| <b>PlantTribes: a gene and gene family resource for comparative genomics in plants</b>                                                         | P.K.Wall, J.Leebens-Mack, K.F.Müller, D.Field, N.S.Altman and C.W.dePamphilis                                                                                                                                               | D970–D976   |
| <b>ppdb: a plant promoter database</b>                                                                                                         | Y.Y.Yamamoto and J.Obokata                                                                                                                                                                                                  | D977–D981   |
| <b>s Update of ASRP: the <i>Arabidopsis</i> Small RNA Project database</b>                                                                     | T.W.H.Backman, C.M.Sullivan, J.S.Cumbie, Z.A.Miller, E.J.Chapman, N.Fahlgren, S.A.Givan, J.C.Carrington and K.D.Kasschau                                                                                                    | D982–D985   |
| <b>CATdb: a public access to <i>Arabidopsis</i> transcriptome data from the URGV-CATMA platform</b>                                            | S.Gagnot, J.-P.Tamby, M.-L.Martin-Magniette, F.Bitton, L.Taconnat, S.Balzergue, S.Aubourg, J.-P.Renou, A.Lecharny and V.Brunaud                                                                                             | D986–D990   |
| <b>GreenPhylDB: a database for plant comparative genomics</b>                                                                                  | M.G.Conte, S.Gaillard, N.Lanau, M.Rouard and C.Périn                                                                                                                                                                        | D991–D998   |
| <b>AtPID: <i>Arabidopsis thaliana</i> protein interactome database—an integrative platform for plant systems biology</b>                       | J.Cui, P.Li, G.Li, F.Xu, C.Zhao, Y.Li, Z.Yang, G.Wang, Q.Yu, Y.Li and T.Shi                                                                                                                                                 | D999–D1008  |
| <b>The <i>Arabidopsis</i> Information Resource (TAIR): gene structure and function annotation</b>                                              | D.Swarbreck, C.Wilks, P.Lamesch, T.Z.Berardini, M.Garcia-Hernandez, H.Foerster, D.Li, T.Meyer, R.Muller, L.Ploetz, A.Radenbaugh, S.Singh, V.Swing, C.Tissier, P.Zhang and E.Huala                                           | D1009–D1014 |
| <b><i>PhosPhAt</i>: a database of phosphorylation sites in <i>Arabidopsis thaliana</i> and a plant-specific phosphorylation site predictor</b> | J.L.Heazlewood, P.Durek, J.Hummel, J.Selbig, W.Weckwerth, D.Walther and W.X.Schulze                                                                                                                                         | D1015–D1021 |
| <b><i>Oryza Tag Line</i>, a phenotypic mutant database for the Génoplante rice insertion line library</b>                                      | P.Larmande, C.Gay, M.Lorieux, C.Périn, M.Bouniol, G.Droc, C.Sallaud, P.Perez, I.Barnola, C.Biderre-Petit, J.Martin, J.B.Morel, A.A.T.Johnson, F.Bourgis, A.Ghesquière, M.Ruiz, B.Courtois and E.Guiderdoni                  | D1022–D1027 |
| <b>The Rice Annotation Project Database (RAP-DB): 2008 update</b>                                                                              | T.Tanaka, B.A.Antonio, S.Kikuchi, T.Matsumoto, Y.Nagamura, H.Numata, H.Sakai, J.Wu, T.Itoh, T.Sasaki, R.Aono, Y.Fujii, T.Habara, E.Harada, M.Kanno, Y.Kawahara and H.Kawashima                                              | D1028–D1033 |

Continued

|                                                                                                                                                |                                                                                                                                                                                                                                                                                                                                                                                                                                                                                                                                                                                                                                                                                                                                                                                                                                                  |             |
|------------------------------------------------------------------------------------------------------------------------------------------------|--------------------------------------------------------------------------------------------------------------------------------------------------------------------------------------------------------------------------------------------------------------------------------------------------------------------------------------------------------------------------------------------------------------------------------------------------------------------------------------------------------------------------------------------------------------------------------------------------------------------------------------------------------------------------------------------------------------------------------------------------------------------------------------------------------------------------------------------------|-------------|
|                                                                                                                                                | H.Kubooka, A.Matsuya, H.Nakaoka, N.Saichi, R.Sanbonmatsu, Y.Sato, Y.Shinso, M.Suzuki, J.-i.Takeda, M.Tanino, F.Todokoro, K.Yamaguchi, N.Yamamoto, C.Yamasaki, T.Imanishi, T.Okido, M.Tada, K.Ikeo, Y.Tateno, T.Gojobori, Y.-C.Lin, F.-J.Wei, Y.-ie Hsing, Q.Zhao, B.Han, M.R.Kramer, R.W.McCombie, D.Lonsdale, C.C.O'Donovan, E.J.Whitfield, R.Apweiler, K.O.Koyanagi, J.P.Khurana, S.Raghuvanshi, N.K.Singh, A.K.Tyagi, G.Haberer, M.Fujisawa, S.Hosokawa, Y.Ito, H.Ikawa, M.Shibata, M.Yamamoto, R.M.Bruskiewich, D.R.Hoen, T.E.Bureau, N.Namiki, H.Ohyanagi, Y.Sakai, S.Nobushima, K.Sakata, R.A.Barrero, Y.Sato, A.Souvorov, B.Smith-White, T.Tatusova, S.An, G.An, S.Oota, G.Fuks, J.Messing, K.R.Christie, D.Lieberherr, H.Kim, A.Zuccolo, R.A.Wing, K.Nobuta, P.J.Green, C.Lu, B.C.Meyers, C.Chaparro, B.Piegu, O.Panaud and M.Echeverria |             |
| <b>GDR (Genome Database for Rosaceae): integrated web-database for Rosaceae genomics and genetics data</b>                                     | S.Jung, M.Statton, T.Lee, A.Blenda, R.Svancara, A.Abbott and D.Main                                                                                                                                                                                                                                                                                                                                                                                                                                                                                                                                                                                                                                                                                                                                                                              | D1034–D1040 |
| <b>Panzea: an update on new content and features</b>                                                                                           | P.Canaran, E.S.Buckler, J.C.Glaubitx, L.Stein, Q.Sun, W.Zhao and D.Ware                                                                                                                                                                                                                                                                                                                                                                                                                                                                                                                                                                                                                                                                                                                                                                          | D1041–D1043 |
| <b>Shanghai RAPESEED Database: a resource for functional genomics studies of seed development and fatty acid metabolism of <i>Brassica</i></b> | G.-Z.Wu, Q.-M.Shi, Y.Niu, M.-Q.Xing and H.-W.Xue                                                                                                                                                                                                                                                                                                                                                                                                                                                                                                                                                                                                                                                                                                                                                                                                 | D1044–D1047 |
| <b>MUGEN mouse database; Animal models of human immunological diseases</b>                                                                     | V.Aidinis, C.Chandras, M.Manoloukos, A.Thanassopoulou, K.Kranidioti, M.Armaka, E.Douni, D.L.Kontoyiannis, M.Zouberakis, G.Kollias and the Mugen NoE consortium                                                                                                                                                                                                                                                                                                                                                                                                                                                                                                                                                                                                                                                                                   | D1048–D1054 |

*S, Supplementary Material available at NAR Online*
